# Supplementary material for: Altered Gray-White Matter Boundary Contrast in Toddlers at Risk for Autism Relates to Later Diagnosis of Autism Spectrum Disorder.
Source: Research Square preprint supplement (doi:10.21203/rs.3.rs-118792/v3), 2021-05-18
Supplement: Supplementary file 1 [file 38cdd7800c5f36df668d1826.docx]

|  | **HR-ASD subgroups by age of first diagnosis** | |  |
| --- | --- | --- | --- |
|  | **late-onset ASD (n=5)** | **early-onset ASD (n=4)** | **p-value** |
| Mean MRI age [months] (*n = 20*) | 15.2 ± 0.4 (14.6 - 15.7) | 16.6 ± 1.4 (15.3 - 18.3) | .191 (U) |
| Time interval between scans [months] (n = 20) | 6.5 ± 0.5 (5.9 - 7.2) | 6.1 ± 0.5 (5.6 - 6.5) | .266 |
| Gender (female number) (*n = 20*) | 0 | 1 |  |
| Age at 1nd clinical assesment (*n = 19*) | 18.4 ± 0.4 (17.7 - 19.1) | 18 ± 0.1 (17.9 - 18.2) | .181 |
| ADOS CSS (*n = 19*) | **2.4 ± 1.1 (1 - 4)** | **7.8 ± 1.7 (6 - 10)** | **<.001** |
| DQ (*n = 19*) | 86.2 ± 5.1 (78.8 - 89.9) | 73.2 ± 13.1 (54.1 - 83.2) | .078 |
| Age at 3rd clinical assesment (*n = 20*) | 36 ± 0.8 (34.9 - 36.8) | 36.8 ± 1.2 (35.5 - 38.3) | .248 |
| ADOS CSS (*n = 20*) | 6.4 ± 1.5 (5 - 9) | 6.25 ± 1.3 (5 - 8) | .879 |
| DQ (*n = 20*) | 77.6 ± 28.9 (32.5 - 103.2) | 77.1 ± 6.1 (70.8 - 84.6) | .974 (U) |
